# Supplementary material
Source: PubMed Central journal article supplement (PMC4587462)
Supplement: supp_pp.15.00787_PP2015-00787R1_Supplemental_Material.pdf [file supp_pp.15.00787_PP2015-00787R1_Supplemental_Material.pdf]

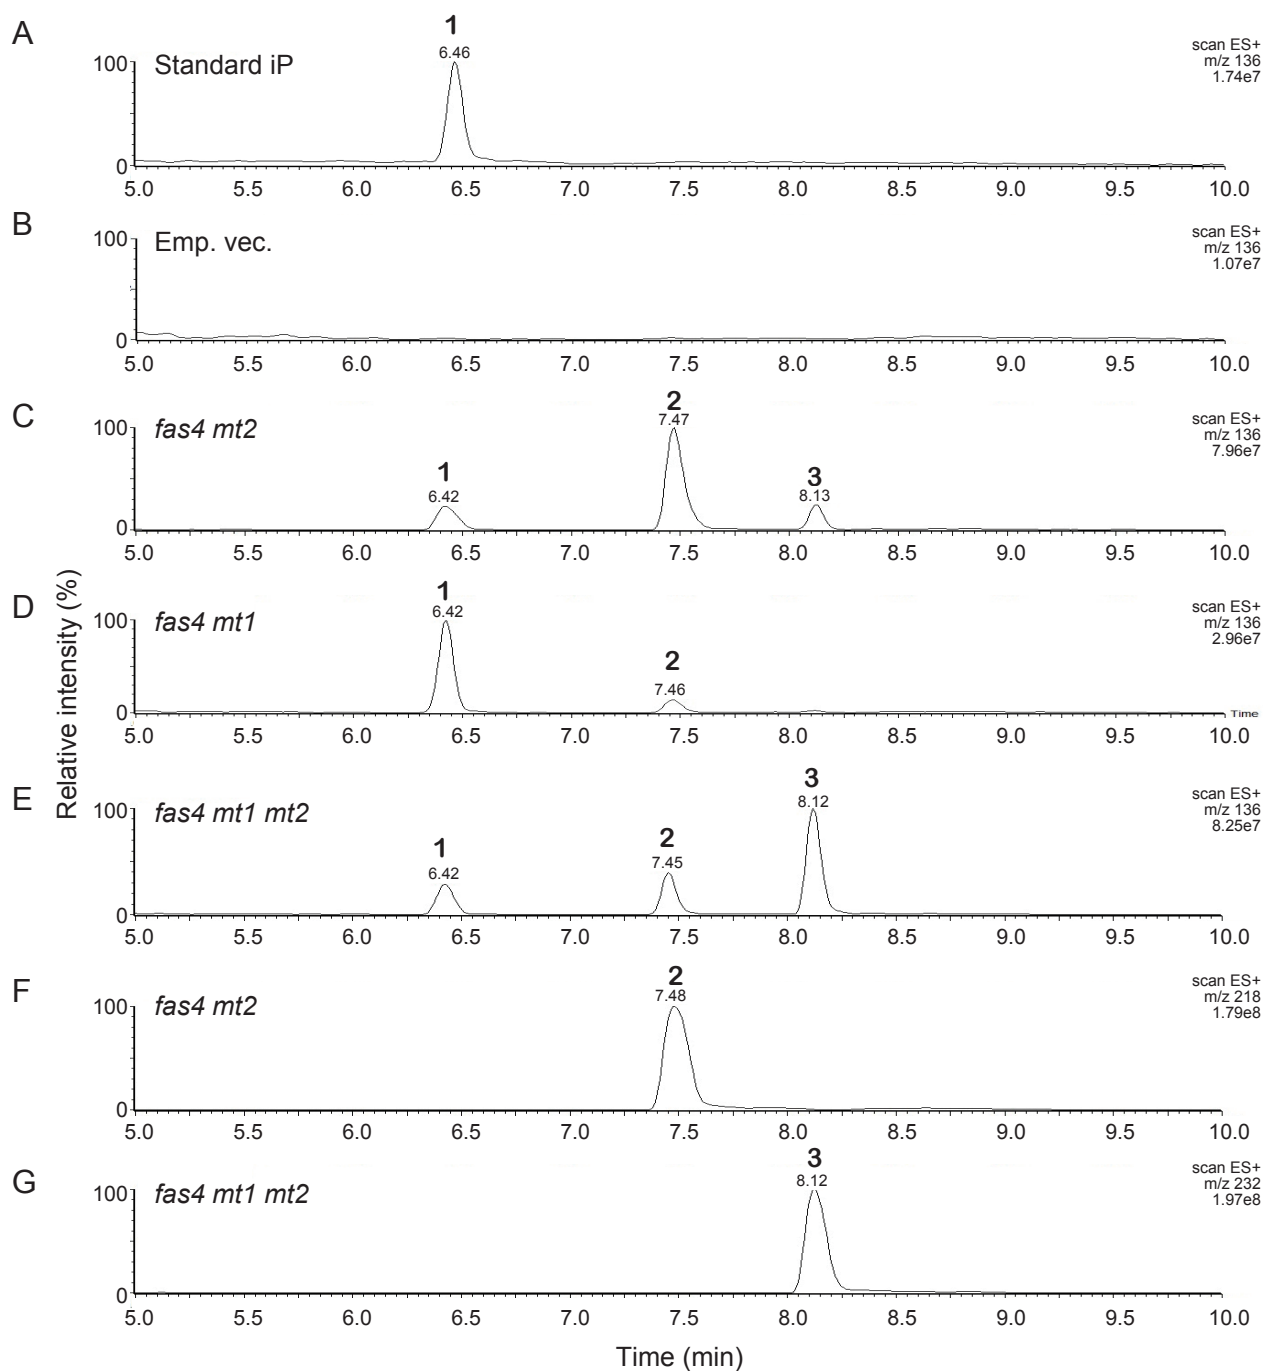

**Supplemental Fig. S1.** Detection of CK-like compounds in liquid culture filtrates of *E. coli* co-expressing *fas4* and *mts*. The CK-containing fractions were prepared by solid phase extraction (1) and analyzed by liquid chromatography-quadrupole tandem mass spectrometry (LC-MS/MS). A – E, Monitoring at *m/z* 136 in the positive ion mode, which corresponds to the adenine moiety; F, Monitoring at *m/z* 218; and G, Monitoring at *m/z* 232. A, Standard iP; B, Control filtrate of *E. coli* harboring the empty vector (Emp. vec.); C and F, Filtrate of *E. coli* harboring *fas4mt2*; D, Filtrate of *E. coli* harboring *fas4mt1*; and E and G, Filtrate of *E. coli* harboring *fas4mt1mt2*. Peak numbers correspond to 1, iP (*m/z* = 204); 2, 1MeiP (*m/z* = 218); 3, 2MeiP (*m/z* = 232).

(1) Kojima M, et al. (2009) Highly sensitive and high-throughput analysis of plant hormones using MS-probe modification and liquid chromatography-tandem mass spectrometry: An application for hormone profiling in *Oryza sativa*. *Plant Cell Physiol* 50(7):1201–1214.

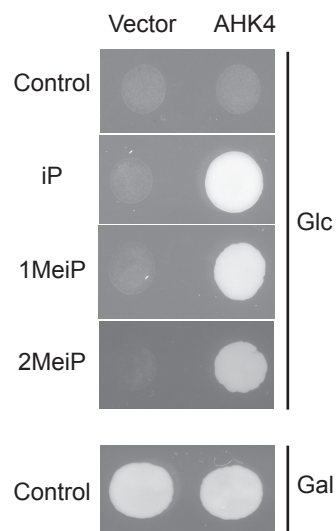

**Supplemental Fig. S2.** CK-dependent growth of yeast *sln1Δ* expressing *Arabidopsis* AHK4.

*sln1Δ* strains (TM182) (1) were transformed with the p415CYC empty vector (Vector) or p415CYC-AHK4 (AHK4). Cultures of the transformants were spotted on synthetic complete (SC) agar media containing 2% glucose (Glc) supplemented with 1  $\mu$ M iP, 1MeiP, or 2MeiP. The control (Control) contains no CKs. Growth of the transformants on SC agar medium containing 2% galactose (Gal) is shown in the bottom panel. Agar plates were incubated at 30°C for 3 days.

(1) Maeda T, Wurgler-Murphy SM, Saito H (1994) A two-component system that regulates an osmosensing MAP kinase cascade in yeast. *Nature* 369:242–245.

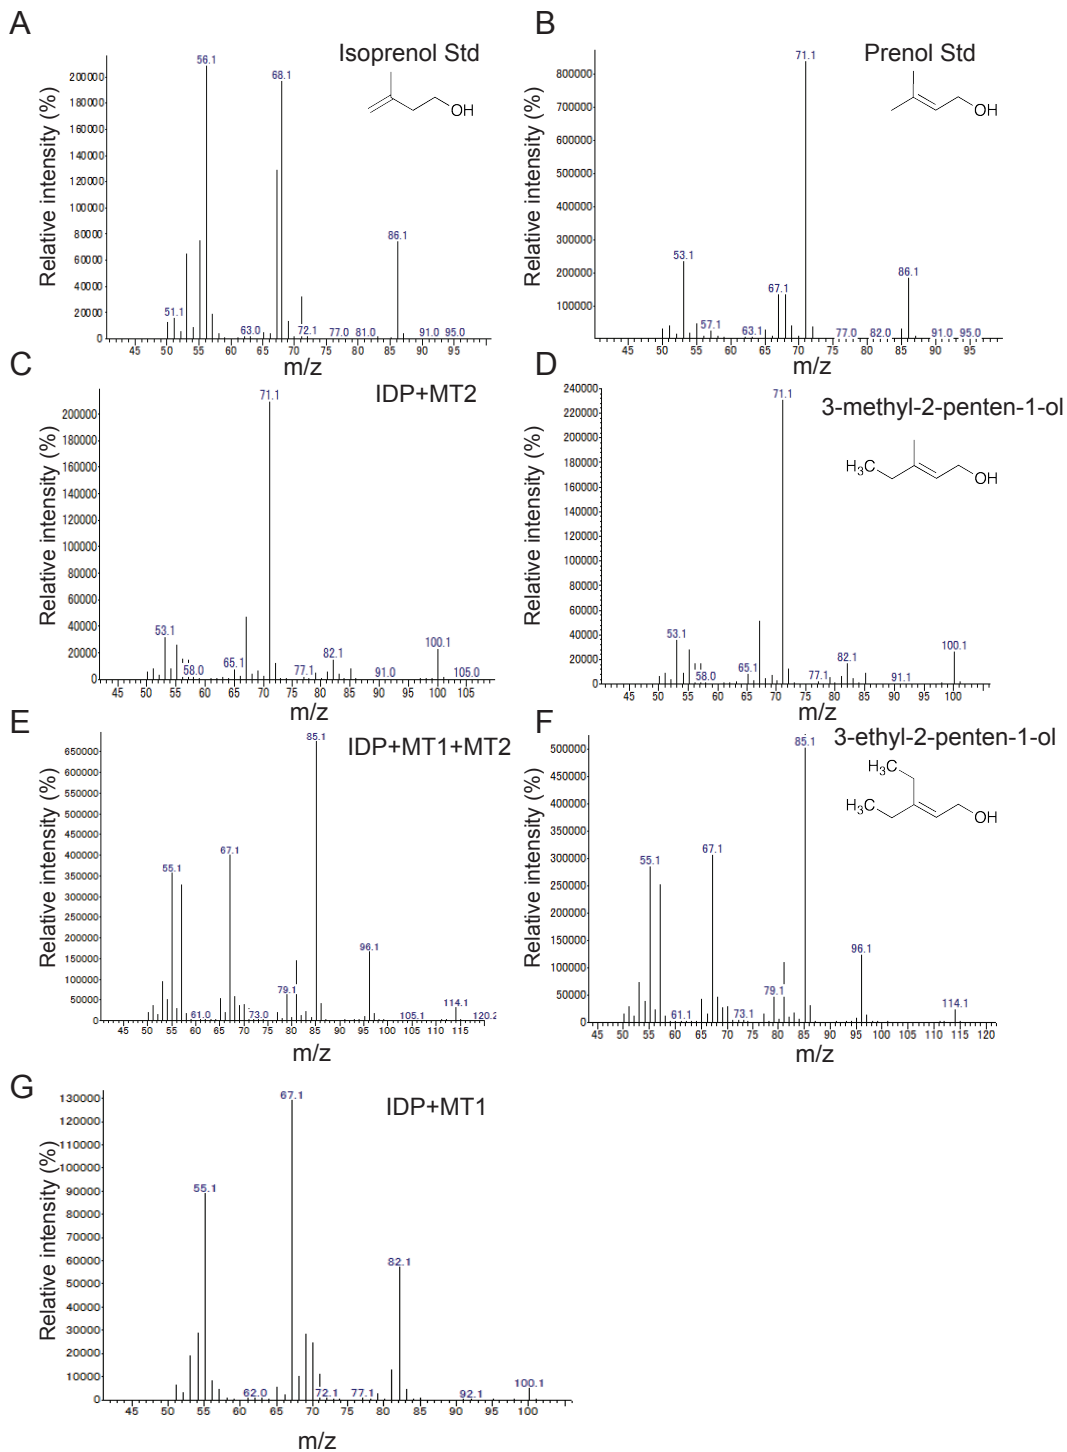

**Supplemental Fig. S3.** Mass spectra of methylated prenyl compounds in GC-MS with electronic ionization. A, 3-Methylbut-3-en-1-ol standard (Isoprenol Std); B, 3-Methyl-2-buten-1-ol standard (Prenol Std); C, MT2 mono-methylated product; D, Synthetic 3-methyl-2-penten-1-ol; E, Di-methylated product of the MT1+MT2 reaction; F, Synthetic 3-ethyl-2-penten-1-ol; and G, MT1 mono-methylated product.

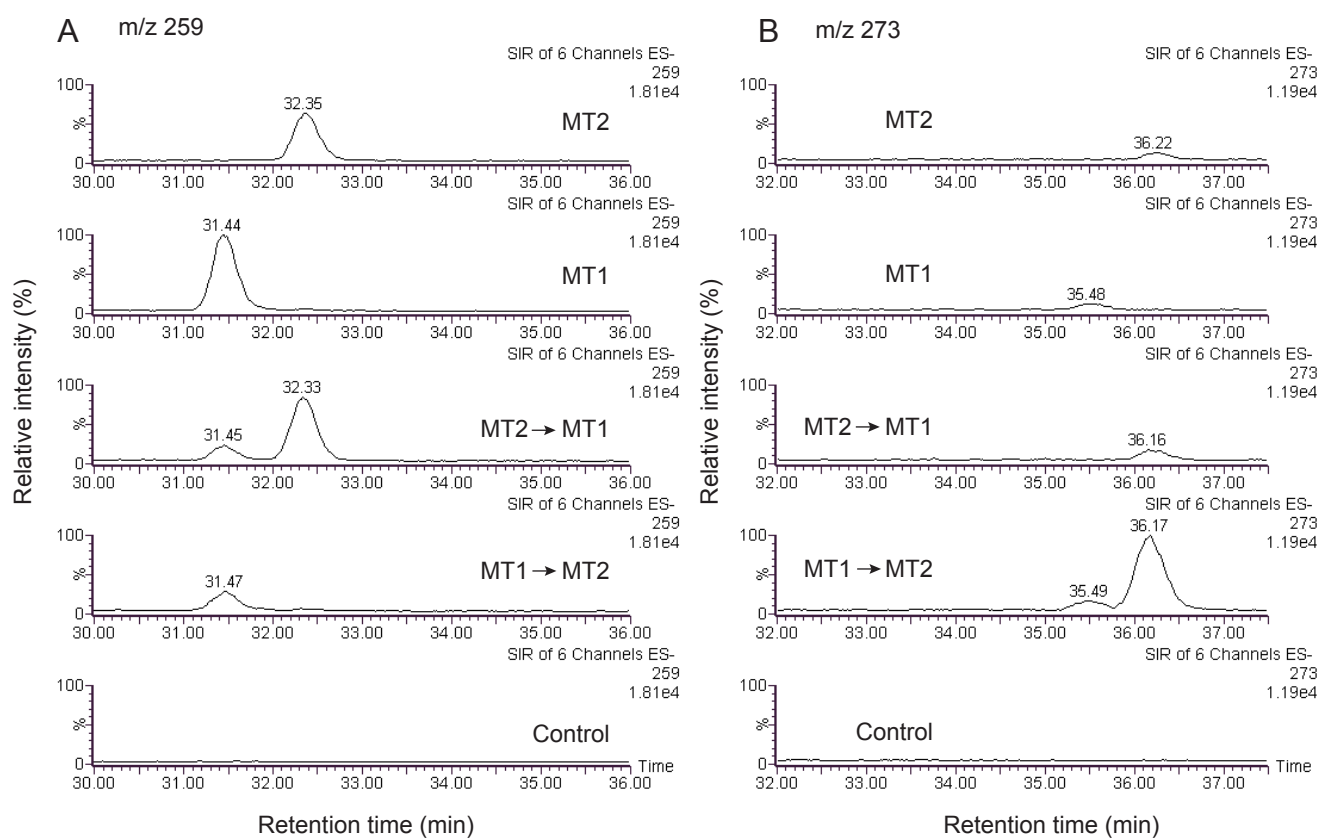

**Supplemental Fig. S4.** Sequential reaction assay. LC-MS chromatograms of *in vitro* MT assay reaction products. The reaction mixtures containing SAM, IDP and either MT1 or MT2 enzymes in MT buffer were incubated at 30°C. After 20 h, the other MT enzyme was added and the reaction mixtures were further incubated for 20 h. MT1, incubation with MT1 only; MT2, incubation with MT2 only; MT2 → MT1, sequential incubation with MT2 and MT1; MT1 → MT2, sequential incubation with MT1 and MT2; Control, no enzymes. The reaction products were analyzed by LC-MS with selected ion modes: A, the mono-methylated prenyl diphosphate product ( $m/z = 259$ ); B, the di-methylated prenyl diphosphate product ( $m/z = 273$ ).

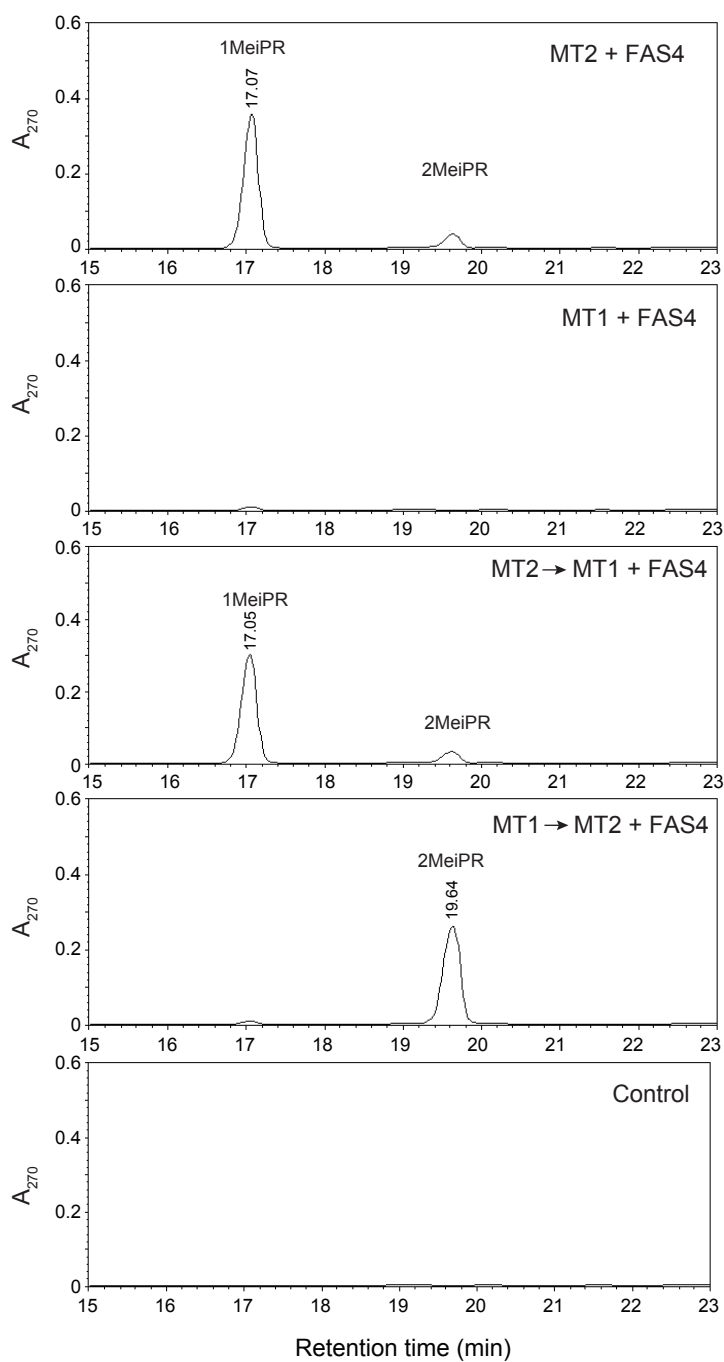

**Supplemental Fig. S5.** Reaction products generated by the *R. fascians* FAS4 recombinant protein using the MT products as substrates. Recombinant FAS4 protein was added to the reaction mixtures shown in Fig. S4, and the samples were incubated for 2 h at 25°C. The generated products were detected by HPLC (Alliance 2695/PDA detector 2996, Waters) as described previously (1).

(1) Sugawara H, *et al.* (2008) Structural insight into the reaction mechanism and evolution of cytokinin biosynthesis. *Proc Natl Acad Sci USA* 105:2734-2739.

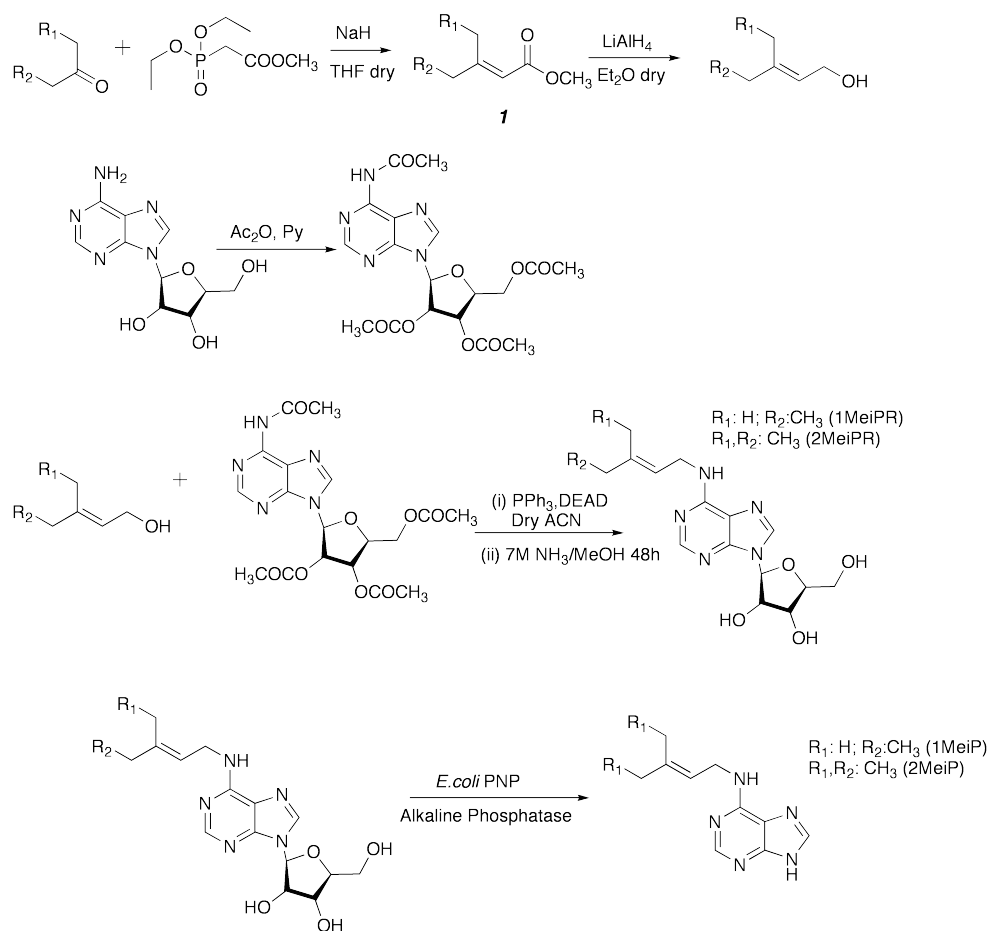

**Supplemental Fig. S6.** Chemical synthesis of 1MeiP and 2MeiP. THF, tetrahydrofuran; Et<sub>2</sub>O, diethyl ether; Ac<sub>2</sub>O, acetic anhydride; Py, pyridine; DEAD, diethyl azodicarboxylate; ACN, acetonitrile; PNP, purine-nucleoside phosphorylase.

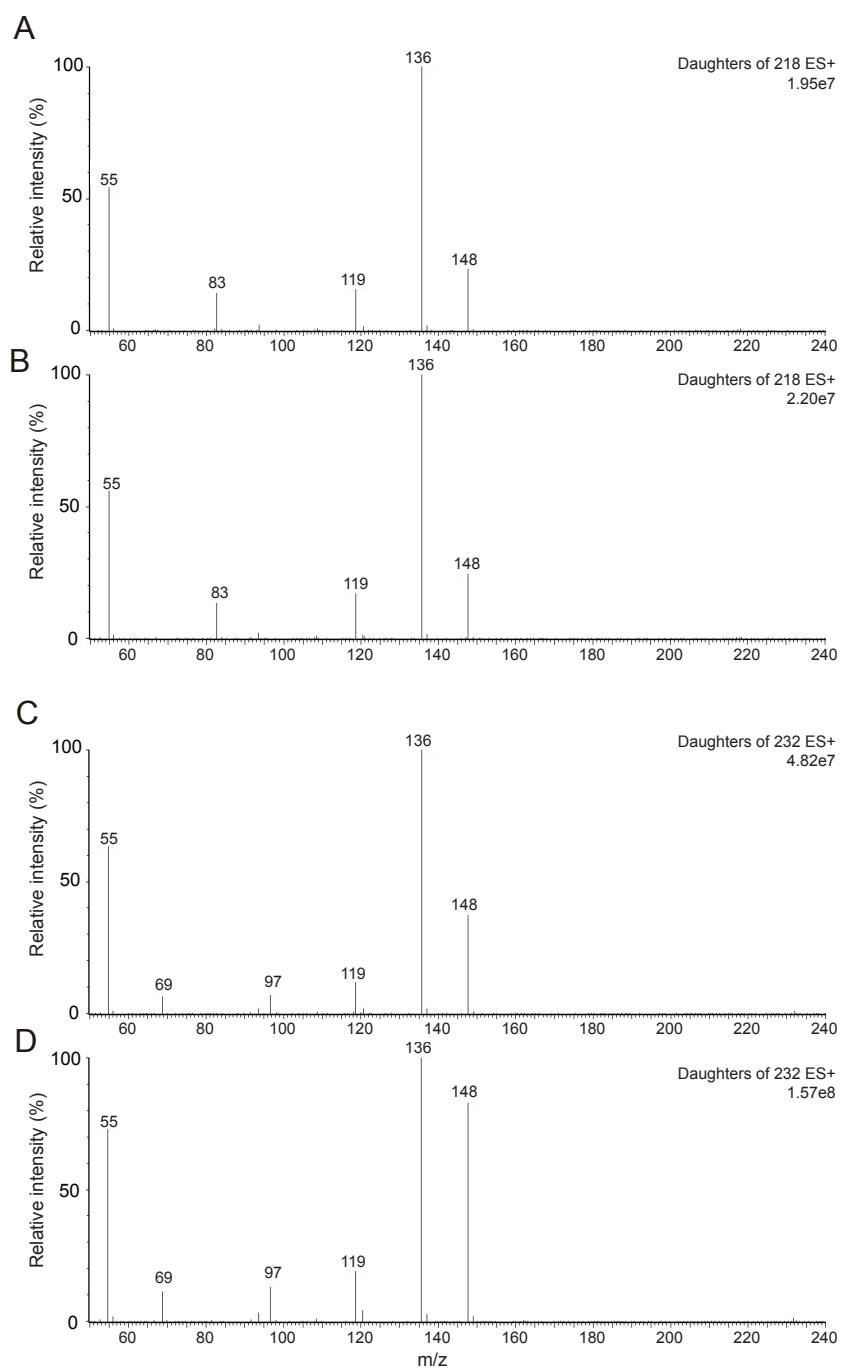

**Supplemental Fig. S7.** Fragmentation patterns of purified and synthesized MeCKs. Mass spectra of daughter ions of  $m/z$  218 (A and B) and  $m/z$  232 (C and D) were analyzed with a LC-MS/MS in the positive ion mode. A, 1MeiP isolated from a filtrate; B, 1MeiP chemically synthesized; C, 2MeiP isolated from a filtrate; and D, 2MeiP chemically synthesized.

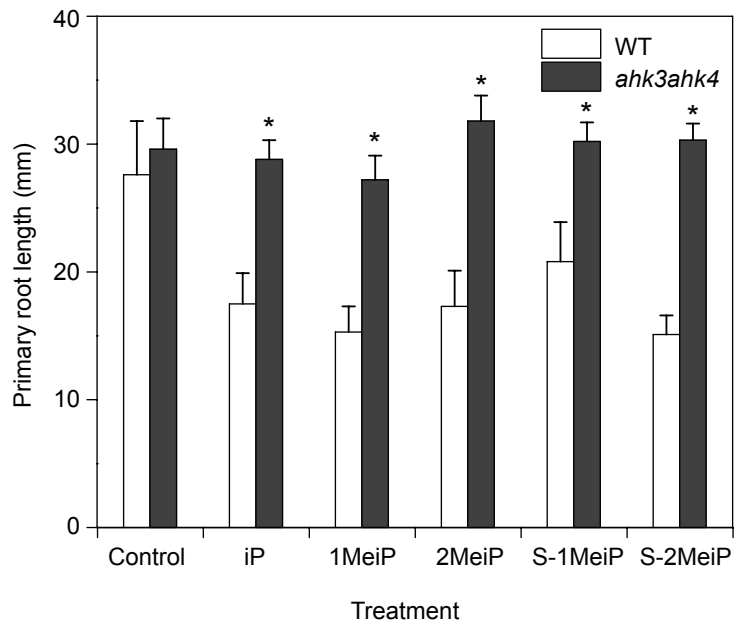

**Supplemental Fig. S8.** Effect of chemically synthesized MeCKs on primary root growth in *Arabidopsis*. Primary root length of wild type (WT) and *ahk3ahk4* double mutant *A. thaliana* plants grown on Murashige-Skoog plates containing 100 nM of the corresponding CK for 7 days. S denotes chemically synthesized MeCKs. Asterisks denote statistical significance in root length between WT and the mutant plant (one-way ANOVA,  $P < 0.05$ ). Error bars represent the SD of ten biological replicates.



**Supplemental Table S1.** CK concentrations in tobacco plants after infection with *R. fascians*.*Infected*

| dpi                               | iP          | 1MeiP       | 2MeiP       | cZ          | tZ          |
|-----------------------------------|-------------|-------------|-------------|-------------|-------------|
| pmol g <sup>-1</sup> fresh weight |             |             |             |             |             |
| 1                                 | 0.13 ± 0.11 | BQ          | BQ          | 0.16 ± 0.27 | 2.37 ± 0.68 |
| 2                                 | 0.70 ± 0.22 | 0.02 ± 0.01 | 0.24 ± 0.02 | 0.09 ± 0.15 | 0.77 ± 0.21 |
| 3                                 | 1.57 ± 0.71 | 0.16 ± 0.03 | 1.13 ± 0.25 | 0.21 ± 0.19 | 0.78 ± 0.27 |
| 5                                 | 1.04 ± 0.43 | 0.09 ± 0.03 | 0.53 ± 0.10 | 0.27 ± 0.08 | 0.98 ± 0.30 |
| 6                                 | 0.87 ± 0.24 | 0.06 ± 0.00 | 0.59 ± 0.05 | 0.21 ± 0.03 | 0.85 ± 0.10 |
| 8                                 | 0.64 ± 0.50 | 0.03 ± 0.01 | 0.28 ± 0.04 | 0.19 ± 0.04 | 0.81 ± 0.55 |

*Uninfected*

| dpi                               | iP | 1MeiP | 2MeiP | cZ          | tZ          |
|-----------------------------------|----|-------|-------|-------------|-------------|
| pmol g <sup>-1</sup> fresh weight |    |       |       |             |             |
| 1                                 | BQ | BQ    | BQ    | BQ          | 4.31 ± 0.27 |
| 2                                 | BQ | BQ    | BQ    | BQ          | 2.82 ± 0.09 |
| 3                                 | BQ | BQ    | BQ    | BQ          | 1.32 ± 0.11 |
| 5                                 | BQ | BQ    | BQ    | 0.24 ± 0.07 | 0.91 ± 0.11 |
| 6                                 | BQ | BQ    | BQ    | 0.11 ± 0.06 | 0.85 ± 0.33 |
| 8                                 | BQ | BQ    | BQ    | 0.27 ± 0.08 | 0.79 ± 0.03 |

Means ± SD (*n* = 3); dpi, days post infection; BQ, below the detection limit.

**Supplemental Table S2** Primers used in this study.

| Sequence (5' to 3')                                                                | Purpose for use                     | Notes                                                                                 |
|------------------------------------------------------------------------------------|-------------------------------------|---------------------------------------------------------------------------------------|
| GCTGTTGATGATAGTATGGTTG<br>AGATATTGTAAGCTCTTGTCG                                    | qPCR analysis for <i>ARR5</i>       | <i>ARR5</i> (At3g48100)                                                               |
| GAAGTTATGCTACCGAGGAAG<br>TACGATCAACGTGACTGTCTG                                     | qPCR analysis for <i>ARR6</i>       | <i>ARR6</i> (At5g62920)                                                               |
| AACATTGTGCTCAGTGGTGG<br>GTGGTGCCACGACCTTAATC                                       | qPCR analysis for <i>ACT8</i>       | <i>ACT8</i> (At1g49240)                                                               |
| CCGCATATGAAGGAATCAACCATGGCAC<br>CGCGGTACCTCATCTGGCGGTACACCTG                       | Construction of pCOLD-IV-fas4       | Template: <i>R. fascians</i> DNA<br>Cloning site: <i>NdeI/KpnI</i> site of pCOLD-IV   |
| AGAGGTAATACCATATGATCTCGGCAGATCAATATGCGCG<br>ATTCCGATCCCTCGAGTCAGATGCGTTCGGCCGCAATC | Construction of pCOLD-IV-mt1        | Template: <i>R. fascians</i> DNA<br>Cloning site: <i>NdeI/XhoI</i> site of pCOLD-IV   |
| CCGCATATGCCGAACCTCGACGTGGCAGTCCTC<br>CGCCTCGAGCTACAGACGCTCGCACGCGATAACC            | Construction of pCOLD-IV-mt2        | Template: <i>R. fascians</i> DNA<br>Cloning site: <i>NdeI/XhoI</i> site of pCOLD-IV   |
| CGAGGGATCCGAATTCACGCCATATCGCCGAAAGGCAC<br>AGATTACCTATCTAGAACTAGTTCAGATGCGTTCGGCCG  | Construction of pCOLD-IV-fas4mt1    | Template: pCOLD-IV-mt1;<br>Cloning into <i>EcoRI/XbaI</i> site of pCOLD-IV-fas4       |
| CGAGGGATCCGAATTCACGCCATATCGCCGAAAGGCAC<br>AGATTACCTATCTAGAACTAGTTCACAGACGCTCGCACG  | Construction of pCOLD-IV-fas4mt2    | Template: pCOLD-IV-mt2;<br>Cloning into <i>EcoRI/XbaI</i> site of pCOLD-IV-fas4       |
| GCGTCTGTAGCTCGAGACGCCATATCGCCGAAAGGCAC<br>CGACAAGCTTGAATTCAGATGCGTTCGGCCGCAATC     | Construction of pCOLD-IV-mt1mt2     | Template: pCOLD-IV-mt1;<br>Cloning into <i>XhoI/EcoRI</i> site of pCOLD-IV-mt2        |
| CGCCAGATGAAAGCTTACGCCATATCGCCGAAAGGCAC<br>AGATTACCTATCTAGAACTAGTTCAGATGCGTTCGGCCG  | Construction of pCOLD-IV-fas4mt1mt2 | Template: pCOLD-IV-mt1mt2;<br>Cloning into <i>HindIII/XbaI</i> site of pCOLD-IV-fas4  |
| CCGGGTACCATGAAGGAATCAACCATGGCAC<br>CGCAAGCTTTCATCTGGCGGTACACCTG                    | Construction of pCOLD-I-fas4        | Template: <i>R. fascians</i> DNA<br>Cloning site: <i>KpnI/HindIII</i> site of pCOLD-I |
| TCGAAGGTAGGCATATGATCTCGGCAGATCAATATGCGCG<br>ATTCCGATCCCTCGAGTCAGATGCGTTCGGCCGCAATC | Construction of pCOLD-I-mt1         | Template: <i>R. fascians</i> DNA<br>Cloning site: <i>NdeI/XhoI</i> site of pCOLD-I    |
| CCGCATATGCCGAACCTCGACGTGGCAGTCCTC<br>CGCCTCGAGCTACAGACGCTCGCACGCGATAACC            | Construction of pCOLD-I-mt2         | Template: <i>R. fascians</i> DNA<br>Cloning site: <i>NdeI/XhoI</i> site of pCOLD-I    |

Restriction sites in primers are underlined.
